# Supplementary material
Source: ML conference proceedings conference paper supplement (https://proceedings.mlr.press/v89/saad19a.html)
Supplement: Supplementary file 1 [file saad19a-supp.pdf]

## A Appendix: Proofs

### A.1 Uniformity of rank

Throughout this appendix, let  $\mathcal{T}$  be a non-empty finite or countably infinite set, let  $\prec$  be a total order on  $\mathcal{T}$  (of any order type), and let  $\mathbf{p}$  and  $\mathbf{q}$  each be a probability distribution on  $\mathcal{T}$ . For  $n \in \mathbb{N}$ , let  $[n]$  denote the set  $\{0, 1, 2, \dots, n-1\}$ .

Given a positive integer  $m$ , define the following random variables:

$$X_0 \sim \mathbf{q} \quad (13)$$

$$U_0 \sim \text{Uniform}(0, 1) \quad (14)$$

$$X_1, X_2, \dots, X_m \stackrel{\text{iid}}{\sim} \mathbf{p} \quad (15)$$

$$U_1, U_2, \dots, U_m \stackrel{\text{iid}}{\sim} \text{Uniform}(0, 1) \quad (16)$$

$$R = \sum_{j=1}^m \mathbb{I}[X_j \prec X_0] + \mathbb{I}[X_j = X_0, U_j < U_0]. \quad (17)$$

Our first main result is the following, which establishes necessary and sufficient conditions for uniformity of the rank statistic.

**Theorem A.1** (Theorem 3.1 in the main text). *We have  $\mathbf{p} = \mathbf{q}$  if and only if for all  $m \geq 1$ , the rank statistic  $R$  is uniformly distributed on  $[m+1] := \{0, 1, \dots, m\}$ .*

Before proving Theorem A.1, we state and prove several lemmas. We begin by showing that an i.i.d. sequence yields a uniform rank distribution.

**Lemma A.2.** *Let  $T_0, T_1, \dots, T_m$  be an i.i.d. sequence of random variables. If  $\Pr\{T_i = T_j\} = 0$  for all distinct  $i$  and  $j$ , then the rank statistics  $S_i := \sum_{j=0}^m \mathbb{I}[T_j \prec T_i]$  for  $0 \leq i \leq m$  are each uniformly distributed on  $[m+1]$ .*

*Proof.* Since  $T_0, T_1, \dots, T_m$  is i.i.d., it is a finitely exchangeable sequence, and so the rank statistics  $S_0, \dots, S_m$  are identically (but not independently) distributed.

Fix an arbitrary  $k \in [m+1]$ . Then  $\Pr\{S_i = k\} = \Pr\{S_j = k\}$  for all  $i, j \in [m+1]$ . By hypothesis,  $\Pr\{T_i = T_j\} = 0$  for distinct  $i$  and  $j$ . Therefore the rank statistics are almost surely distinct, and the events  $\{S_i = j\}$  (for  $0 \leq i \leq m$ ) are mutually exclusive and exhaustive. Since these events partition the outcome space, their probabilities sum to 1, and so  $\Pr\{S_i = k\} = 1/(m+1)$  for all  $i \in [m+1]$ .

Because  $k$  was arbitrary,  $S_i$  is uniformly distributed on  $[m+1]$  for all  $i \in [m+1]$ .  $\square$

We will also use the following result about convergence of discrete uniform variables to a continuous uniform random variable.

**Lemma A.3.** *Let  $(V_m)_{m \geq 1}$  be a sequence of discrete random variables such that  $V_m$  is uniformly distributed on  $\{0, 1/m, 2/m, \dots, 1\}$ , and let  $U$  be a continuous random variable uniformly distributed on the interval  $[0, 1]$ . Then  $(V_m)_{m \geq 1}$  converges in distribution to  $U$ , i.e.,*

$$\lim_{m \rightarrow \infty} \Pr\{V_m < u\} = \Pr\{U < u\} = u. \quad (18)$$

for all  $u \in [0, 1]$ .

Furthermore, the convergence (18) is uniform in  $u$ .

*Proof.* Let  $\epsilon > 0$ . The distribution function  $F_m$  of  $V_m$  is given by

$$F_m(u) = \begin{cases} 1/(m+1) & u \in [0, 1/m) \\ 2/(m+1) & u \in [1/m, 2/m) \\ \dots & \dots \\ (a+1)/(m+1) & u \in [a/m, (a+1)/m) \\ \dots & \dots \\ m/(m+1) & u \in [(m-1)/m, 1) \\ 1 & u = 1. \end{cases}$$

Observe that for  $0 \leq a < m$ , the value  $F_m(u)$  lies in the interval  $[a/m, (a+1)/m)$  since we have that  $(a/m) < (a+1)/(m+1) < (a+1)/m$ . Since  $u$  is also in this interval,  $|F_m(u) - u| \leq (a+1)/m - a/m = 1/m < \epsilon$  whenever  $m > 1/\epsilon$ , for all  $u$ .  $\square$

The following intermediate value lemma for step functions on the rationals is straightforward. It makes use of sums defined over subsets of the rationals, which are well-defined, as we discuss in the next remark.

**Lemma A.4.** *Let  $p: (\mathbb{Q} \cap [0, 1]) \rightarrow [0, 1]$  be a function satisfying  $p(0) = 0$  and  $\sum_{x \in \mathbb{Q} \cap [0, 1]} p(x) = 1$ . Then for each  $\delta \in (0, 1)$ , there is some  $w \in \mathbb{Q} \cap [0, 1]$  such that*

$$\sum_{x \in \mathbb{Q} \cap (0, w)} p(x) \leq \delta \leq \sum_{x \in \mathbb{Q} \cap (0, w)} p(x).$$

**Remark A.5.** The infinite sums in Lemma A.4 taken over a subset of the rationals can be formally defined as follows: Consider an arbitrary enumeration  $\{q_1, q_2, \dots, q_n, \dots\}$  of  $\mathbb{Q} \cap [0, 1]$ , and define the summation over the integer-valued index  $n \geq 1$ . Since the series consists of positive terms, it converges absolutely, and so all rearrangements of the enumeration converge to the same sum (see, e.g., [27, Theorem 3.55]).

One can show that the Cauchy criterion holds in this setting. Namely, suppose that a sum  $\sum_{a < x < c} p(x)$  of non-negative terms converges. Then for all  $\epsilon > 0$  there is some rational  $b \in (a, c)$  such that  $\sum_{a < x \leq b} p(x) < \epsilon$ .

We now prove both directions of Theorem A.1.

*Proof of Theorem A.1.* Because  $\mathcal{T}$  is countable, by a standard back-and-forth argument the total order  $(\mathcal{T}, <)$  is isomorphic to  $(B, <)$  for some subset  $B \subseteq \mathbb{Q} \cap (0, 1)$ . Without loss of generality, we may therefore take  $\mathcal{T}$  to be  $\mathbb{Q} \cap [0, 1]$  and assume that  $\mathbf{p}(0) = \mathbf{p}(1) = 0$ .

Consider the unit square  $[0, 1]^2$  equipped with the dictionary order  $\triangleleft_d$ . This is a total order with the least upper bound property. For each  $i \in [m + 1]$ , define  $T_i := (X_i, U_i)$ , which takes values in  $[0, 1]^2$ , and observe that the rank  $R$  in Eq. (6) of Theorem A.1 is equivalent to the rank  $\sum_{i=0}^m \mathbb{I}[T_i \triangleleft_d T_0]$  of  $T_0$  taken according to the dictionary order.

**(Necessity)** Suppose  $\mathbf{p} = \mathbf{q}$ . Then  $T_0, \dots, T_m$  are independent and identically distributed. Since  $U_0, \dots, U_m$  are continuous random variables, we have  $\Pr\{T_i = T_j\} = 0$  for all  $i \neq j$ . Apply Lemma A.2.

**(Sufficiency)** Suppose that for all  $m > 0$ , we have that the rank  $R$  is uniformly distributed on  $\{0, 1, 2, \dots, m\}$ . We begin the proof by first constructing a distribution function  $F_{\mathbf{p}}$  on the unit square and then establishing several of its properties. First let  $\tilde{\mathbf{p}}: [0, 1] \rightarrow [0, 1]$  be the “left-closed right-open” cumulative distribution function of  $\mathbf{p}$ , defined by

$$\tilde{\mathbf{p}}(x) := \sum_{y \in \mathbb{Q} \cap [0, x]} \mathbf{p}(y)$$

for  $x \in [0, 1]$ . Define  $\mathbf{p}'$  to be the probability measure on  $[0, 1]$  that is equal to  $\mathbf{p}$  on subsets of  $\mathbb{Q} \cap [0, 1]$  and is null elsewhere, and define the distribution function  $F_{\mathbf{p}'}: [0, 1]^2 \rightarrow [0, 1]$  on  $S$  by

$$F_{\mathbf{p}'}(x, u) := \tilde{\mathbf{p}}(x) + u\mathbf{p}'(x)$$

for  $(x, u) \in [0, 1]^2$ . To establish that  $F_{\mathbf{p}'}$  is a valid distribution function, we show that its range is  $[0, 1]$ ; it is monotonically non-decreasing in each of its variables; and it is right-continuous in each of its variables.

It is immediate that  $F_{\mathbf{p}'}(0, 0) = 0$  and  $F_{\mathbf{p}'}(1, 1) = 1$ . Furthermore, To establish that  $F_{\mathbf{p}'}$  is monotonically non-decreasing, put  $x < y$  and  $u < v$  and observe that

$$\begin{aligned} F_{\mathbf{p}'}(x, u) &= \tilde{\mathbf{p}}(x) + u\mathbf{p}'(x) \\ &\leq \tilde{\mathbf{p}}(x) + \mathbf{p}'(x) \\ &\leq \sum_{z \in \mathbb{Q} \cap [0, y]} \mathbf{p}'(z) \\ &= \tilde{\mathbf{p}}(y) \\ &\leq F_{\mathbf{p}'}(y, u) \end{aligned}$$

and

$$\begin{aligned} F_{\mathbf{p}'}(x, u) &= \tilde{\mathbf{p}}(x) + u\mathbf{p}'(x) \\ &\leq \tilde{\mathbf{p}}(x) + v\mathbf{p}'(x) \\ &= F_{\mathbf{p}'}(x, v). \end{aligned}$$

We now establish right-continuity. For fixed  $x$ ,  $F_{\mathbf{p}'}(x, u)$  is a linear function of  $u$  and so continuity is immediate. For fixed  $u$ , we have shown that  $F_{\mathbf{p}'}(x, u)$  is non-decreasing so it is sufficient to show that for any  $x$  and for any  $\epsilon > 0$  there exists  $x' > x$  such that

$$\begin{aligned} \epsilon &> F(x', u) - F(x, u) \\ &= \tilde{\mathbf{p}}(x') + u\mathbf{p}'(x') - \tilde{\mathbf{p}}(x) - u\mathbf{p}'(x) \\ &= \tilde{\mathbf{p}}(x') + u\mathbf{p}'(x') - \tilde{\mathbf{p}}(x) - u\mathbf{p}'(x) \\ &= \sum_{y \in \mathbb{Q} \cap [x, x']} \mathbf{p}(y), \end{aligned}$$

which is immediate from the Cauchy criterion.

Finally, we note that Lemma A.4 and the continuity of  $F_{\mathbf{p}'}$  in  $u$  together imply that  $F_{\mathbf{p}'}$  obtains all intermediate values, i.e., for any  $\delta \in [0, 1]$  there is some  $(x, u)$  such that  $F(x, u) = \delta$ .

Next define the inverse  $F_{\mathbf{p}'}^{-1}: [0, 1] \rightarrow [0, 1]^2$  by

$$F_{\mathbf{p}'}^{-1}(s) := \inf \{(x, u) \mid F_{\mathbf{p}'}(x, u) = s\} \quad (19)$$

for  $s \in [0, 1]$ , where the infimum is taken with the respect to the dictionary order  $\triangleleft_d$ . The set in Eq (19) is non-empty since  $F_{\mathbf{p}'}$  obtains all values in  $[0, 1]$ . Moreover,  $F_{\mathbf{p}'}^{-1}(s) \in [0, 1]^2$  since  $\triangleleft_d$  has the least upper bound property. (This “generalized” inverse is used since  $F_{\mathbf{p}'}$  is one-to-one only under the stronger assumption that  $\mathbf{p}(x) > 0$  for all  $x \in \mathbb{Q} \cap (0, 1)$ .) Analogously define  $F_{\mathbf{q}}$  in terms of  $\mathbf{q}$ .

Now define the rank function

$$r(a_0, \{a_1, \dots, a_m\}) := \sum_{i=0}^m \mathbb{I}[a_i < a_0]$$

and note that  $R \equiv r(T_0, \{T_1, \dots, T_m\})$ . By the hypothesis,  $r(T_0, \{T_1, \dots, T_m\})/m$  is uniformly distributed on  $\{0, 1/m, 2/m, \dots, 1\}$  for all  $m > 0$ . Applying Lemma A.3 gives

$$\begin{aligned} \lim_{m \rightarrow \infty} \Pr \left\{ \frac{1}{m} \tilde{r}(T_0, \{T_1, \dots, T_m\}) < s \right\} \\ &= \Pr \{U_0 < s\} \\ &= s. \end{aligned} \quad (20)$$

for  $s \in [0, 1]$ .

For any  $t \in [0, 1]$  and  $m \geq 1$ , the random variable  $\hat{F}_{\mathbf{p}'}^m(t) := \tilde{r}(t, \{T_1, \dots, T_m\})/m$  is the empirical distribution of  $F_{\mathbf{p}'}$ . Therefore, by the Glivenko–Cantelli theorem for empirical distribution functions on  $k$ -dimensional Euclidean space [9, Corollary of Theorem 4], the sequence of random variables  $(\hat{F}_{\mathbf{p}'}^m(t))_{m \geq 1}$  converges a.s. to the real number  $F_{\mathbf{p}'}(t)$  uniformly in  $t$ . Hence the sequence  $(\hat{F}_{\mathbf{p}'}^m(T_0))_{m \geq 1}$  converges a.s. to the

random variable  $\hat{F}_{\mathbf{p}}(T_0)$ , so that for any  $s \in [0, 1]$ ,

$$\begin{aligned} \lim_{m \rightarrow \infty} \Pr \left\{ \frac{1}{m} \tilde{r}(T_0, \{T_1, \dots, T_m\}) < s \right\} \\ = \lim_{m \rightarrow \infty} \Pr \left\{ \hat{F}_{\mathbf{p}}^m(T_0) < s \right\} \end{aligned} \quad (21)$$

$$= \Pr \{F_{\mathbf{p}}(T_0) < s\} \quad (22)$$

$$= \Pr \{T_0 \triangleleft_d F_{\mathbf{p}}^{-1}(s)\} \quad (23)$$

$$= F_{\mathbf{q}}(F_{\mathbf{p}}^{-1}(s)). \quad (24)$$

The interchange of the limit and the probability in Eq. (22) follows from the bounded convergence theorem, since  $\hat{F}_{\mathbf{p}}^m(T_0) \rightarrow F_{\mathbf{p}}(T_0)$  a.s. and for all  $m \geq 1$  we have  $|\hat{F}_{\mathbf{p}}^m(T_0)| \leq 1$  a.s.

Combining Eq. (20) and Eq. (24), we see that

$$F_{\mathbf{q}}(F_{\mathbf{p}}^{-1}(s)) = s \implies F_{\mathbf{p}}^{-1}(s) = F_{\mathbf{q}}^{-1}(s),$$

for  $s \in [0, 1]$ . Since  $0 \leq F_{\mathbf{p}}(x, u) \leq 1$ , for each  $(x, u) \in [0, 1]^2$  we have

$$\begin{aligned} F_{\mathbf{q}}^{-1}(F_{\mathbf{p}}(x, u)) &= F_{\mathbf{p}}^{-1}(F_{\mathbf{p}}(x, u)) \\ &= F_{\mathbf{q}}^{-1}(F_{\mathbf{q}}(x, u)) \\ &= (x, u). \end{aligned}$$

It follows that  $F_{\mathbf{p}}(x, u) = F_{\mathbf{q}}(x, u)$  for all  $(x, u) \in [0, 1]^2$ . Fixing  $u = 0$ , we obtain

$$\tilde{\mathbf{p}}(x) = F_{\mathbf{p}}(x, 0) = F_{\mathbf{q}}(x, 0) = \tilde{\mathbf{q}}(x) \quad (25)$$

for  $x \in [0, 1]$ .

Assume, towards a contradiction, that  $\mathbf{p} \neq \mathbf{q}$ . Let  $a$  be any rational such that  $\mathbf{p}(a) \neq \mathbf{q}(a)$ , and suppose without loss of generality that  $\mathbf{q}(a) < \mathbf{p}(a)$ . By the Cauchy criterion (Remark A.4), there exists some  $b > a$  such that

$$\sum_{a < x < b} \mathbf{q}(x) < \mathbf{p}(a) - \mathbf{q}(a).$$

Then we have

$$\begin{aligned} \tilde{\mathbf{q}}(b) &= \tilde{\mathbf{q}}(a) + \mathbf{q}(a) + \sum_{x \in \mathbb{Q} \cap (a, b)} \mathbf{q}(x) \\ &= \tilde{\mathbf{p}}(a) + \mathbf{q}(a) + \sum_{x \in \mathbb{Q} \cap (a, b)} \mathbf{q}(x) \\ &< \tilde{\mathbf{p}}(a) + \mathbf{q}(a) + (\mathbf{p}(a) - \mathbf{q}(a)) \\ &= \tilde{\mathbf{p}}(a) + \mathbf{p}(a) \\ &\leq \tilde{\mathbf{p}}(b), \end{aligned}$$

and so  $\tilde{\mathbf{p}} \neq \tilde{\mathbf{q}}$ , contradicting Eq. (25).  $\square$

The following corollary is an immediate consequence.

**Corollary A.6** (Corollary 3.3 in the main text). *If  $\mathbf{p} \neq \mathbf{q}$ , then there is some  $m$  such that  $R$  is not uniformly distributed on  $[m + 1]$ .*

The next theorem strengthens Corollary A.6 by showing that  $R$  is non-uniform for all but finitely many  $m$ .

**Theorem A.7** (Theorem 3.4 in the main text). *If  $\mathbf{p} \neq \mathbf{q}$ , then there is some  $M \geq 1$  such that for all  $m \geq M$ , the rank  $R$  is not uniformly distributed on  $[m + 1]$ .*

Before proving Theorem A.7, we show the following lemma.

**Lemma A.8.** *Suppose  $Z_1, \dots, Z_{m+1}$  is a finitely exchangeable sequence of Bernoulli random variables. If*

$$S_m := \sum_{i=1}^m Z_i$$

*is not uniformly distributed on  $[m + 1]$ , then*

$$S_{m+1} := \sum_{i=1}^{m+1} Z_i$$

*is not uniformly distributed on  $[m + 2]$ .*

*Proof.* By finite exchangeability, there is some  $r \in [0, 1]$  such that the distribution of every  $Z_i$  is Bernoulli( $r$ ). There are two cases.

**Case 1:**  $r \neq 1/2$ . For any  $\ell \geq 1$ , we have

$$\mathbb{E}[S_{\ell}] = \mathbb{E} \left[ \sum_{i=1}^{\ell} Z_i \right] = \sum_{i=1}^{\ell} \mathbb{E}[Z_i] = \ell r \neq r/2 = \mathbb{E}[U_{\ell}],$$

and so  $S_{\ell}$  is not uniformly distributed on  $[\ell + 1]$ . In particular, this holds for  $\ell$  equal to either  $m$  or  $m + 1$ , and so both the hypothesis and conclusion are true.

**Case 2:**  $r = 1/2$ . We prove the contrapositive. Suppose that  $S_{m+1}$  is uniformly distributed on  $[m+1]$ .

Assume  $S_{m+1}$  is uniform and fix  $k \in [m + 1]$ . By total probability, we have

$$\begin{aligned} \Pr \{S_m = k\} &= \Pr \{S_m = k \text{ and } Z_{m+1} = 0\} \\ &\quad + \Pr \{S_m = k \text{ and } Z_{m+1} = 1\}. \end{aligned} \quad (26)$$

We consider the two events on the right-hand side of Eq. (26) separately.

First, the event  $\{S_m = k\} \cap \{Z_{m+1} = 0\}$  is the union over all  $\binom{m}{k}$  assignments of  $(Z_1, \dots, Z_m)$  that have exactly  $k$  ones and  $Z_{m+1} = 0$ . All such assignments are disjoint events. Define the event

$$\begin{aligned} A &:= \{Z_1 = \dots = Z_k = 1 \\ &\quad \text{and } Z_{k+1} = \dots = Z_m = Z_{m+1} = 0\}. \end{aligned}$$

By finite exchangeability, each assignment has probability  $\Pr\{A\}$ , and so

$$\Pr\{S_m = k \text{ and } Z_{m+1} = 0\} = \binom{m}{k} \Pr\{A\}. \quad (27)$$

Now, observe that the event  $\{S_{m+1} = k\}$  is the union of all  $\binom{m+1}{k}$  assignments of  $(Z_1, \dots, Z_{m+1})$  that have exactly  $k$  ones. All the assignments are disjoint events and each has probability  $\Pr\{A\}$ , and so

$$\begin{aligned} \Pr\{S_{m+1} = k\} &= \binom{m+1}{k} \Pr\{A\} \\ &= \frac{1}{m+2}. \end{aligned} \quad (28)$$

Second, the event  $\{S_m = k\} \cap \{Z_{m+1} = 1\}$  is the union over all  $\binom{m}{k}$  assignments of  $(Z_1, \dots, Z_m)$  that have exactly  $k$  ones and also  $Z_{m+1} = 1$ . All such assignments are disjoint events. Define the event

$$\begin{aligned} B &:= \{Z_1 = \dots = Z_k = Z_{m+1} = 1 \\ &\quad \text{and } Z_{k+1} = \dots = Z_m = 0\}. \end{aligned}$$

Again by finite exchangeability, each assignment has probability  $\Pr\{B\}$ , and so

$$\Pr\{S_m = k \text{ and } Z_{m+1} = 1\} = \binom{m}{k} \Pr\{B\}. \quad (29)$$

Likewise, observe that the event  $\{S_{m+1} = k+1\}$  is the union of all  $\binom{m+1}{k+1}$  assignments of  $(Z_1, \dots, Z_{m+1})$  that have exactly  $k+1$  ones. All the assignments are disjoint events and each has probability  $\Pr\{B\}$ , and so

$$\begin{aligned} \Pr\{S_{m+1} = k+1\} &= \binom{m+1}{k+1} \Pr\{B\} \\ &= \frac{1}{m+2}. \end{aligned} \quad (30)$$

We now take Eq. (26), divide by  $1/(m+2)$ , and replace terms using Eqs. (27), (28), (29), and (30):

$$\begin{aligned} &\frac{\Pr\{S_m = k\}}{1/(m+2)} \\ &= \frac{\Pr\{S_m = k \text{ and } Z_{m+1} = 0\}}{1/(m+2)} \\ &\quad + \frac{\Pr\{S_m = k \text{ and } Z_{m+1} = 1\}}{1/(m+2)} \\ &= \frac{\binom{m}{k} \Pr\{A\}}{\binom{m+1}{k} \Pr\{A\}} + \frac{\binom{m}{k} \Pr\{B\}}{\binom{m+1}{k+1} \Pr\{B\}} \\ &= \frac{m!}{k!(m-k)!} \frac{k!(m+1-k)!}{(m+1)!} \\ &\quad + \frac{m!}{k!(m-k)!} \frac{(k+1)!(m+1-(k+1))!}{(m+1)!} \end{aligned}$$

$$\begin{aligned} &= \frac{m+1-k}{m+1} + \frac{k+1}{m+1} \\ &= \frac{m+2}{m+1} \\ &= \frac{1/(m+1)}{1/(m+2)}, \end{aligned}$$

and so we conclude that  $\Pr\{S_m = k\} = 1/(m+1)$ .  $\square$

We are now ready to prove Theorem A.7.

*Proof of Theorem A.7.* Suppose  $\mathbf{p} \neq \mathbf{q}$ . By Corollary A.6, there is some  $M \geq 1$  such that the rank statistic  $R = \sum_{i=1}^M \mathbb{I}[T_i \prec T_0]$  for  $m = M$  is non-uniform over  $[M+1]$ . Observe that the rank statistic for  $m = M+1$  is given by  $\sum_{i=1}^{M+1} \mathbb{I}[T_i \prec T_0]$ .

Now, each indicator  $Z_i := \mathbb{I}[T_i \prec T_0]$  is a Bernoulli random variable, and they are identically distributed since  $(T_1, \dots, T_{M+1})$  is an i.i.d. sequence. Furthermore the sequence  $(Z_1, \dots, Z_{M+1})$  is finitely exchangeable since the  $Z_i$  are conditionally independent given  $T_0$ . Then the sequence of indicators  $(\mathbb{I}[T_1 \prec T_0], \mathbb{I}[T_2 \prec T_0], \dots, \mathbb{I}[T_{M+1} \prec T_0])$  satisfy the hypothesis of Lemma A.8, and so the rank statistic for  $M+1$  is non-uniform. By induction, the rank statistic is non-uniform for all  $m \geq M$ .  $\square$

In fact, unless  $\mathbf{p}$  and  $\mathbf{q}$  satisfy an adversarial symmetry relationship under the selected ordering  $\prec$ , the rank is non-uniform for *any* choice of  $m \geq 1$ . Let  $\triangleleft$  denote the lexicographic order on  $\mathcal{T} \times [0, 1]$  induced by  $(\mathcal{T}, \prec)$  and  $([0, 1], <)$ .

**Corollary A.9** (Corollary 3.5 in the main text). *Suppose  $\Pr\{(X, U_1) \triangleleft (Y, U_0)\} \neq 1/2$  for  $Y \sim \mathbf{q}$ ,  $X \sim \mathbf{p}$ , and  $U_0, U_1 \sim^{\text{iid}} \text{Uniform}(0, 1)$ . Then for all  $m \geq 1$ , the rank  $R$  is not uniformly distributed on  $[m+1]$ .*

*Proof.* If  $\Pr\{(X, U_1) \triangleleft (Y, U_0)\} \neq 1/2$  then  $R$  is non-uniform for  $m = 1$ . The conclusion follows by Theorem A.7.  $\square$

## A.2 An ordering that witnesses $\mathbf{p} \neq \mathbf{q}$ for $m = 1$

We now describe an ordering  $\prec$  for which, when  $m = 1$ , we have  $\Pr\{R = 0\} > 1/2$ .

Define

$$A := \{x \in \mathcal{T} \mid \mathbf{q}(x) > \mathbf{p}(x)\}$$

to be the set of all elements of  $\mathcal{T}$  that have a greater probability according to  $\mathbf{q}$  than according to  $\mathbf{p}$ , and let  $A^c$  denote its complement. Let  $\mathbf{h}_{\mathbf{p}, \mathbf{q}}$  be the signed measure given by the difference  $\mathbf{h}_{\mathbf{p}, \mathbf{q}}(x) := \mathbf{q}(x) - \mathbf{p}(x)$

between  $\mathbf{q}$  and  $\mathbf{p}$ ; for the rest of this subsection, we denote this simply by  $\mathbf{h}$ . Let  $\prec$  be any total order on  $\mathcal{T}$  satisfying

- if  $\mathbf{h}(x) > \mathbf{h}(x')$  then  $x \prec x'$ ; and
- if  $\mathbf{h}(x) < \mathbf{h}(x')$  then  $x \succ x'$ .

The linear ordering  $\prec$  may be defined arbitrarily for all pairs  $x$  and  $x'$  which satisfy  $\mathbf{h}(x) = \mathbf{h}(x')$ . As an immediate consequence,  $x \prec x'$  whenever  $x \in A$  and  $x' \in A^c$ . Intuitively, the ordering is designed to ensure that elements  $x \in A$  are “small”, and are ordered by decreasing value of  $\mathbf{q}(x) - \mathbf{p}(x)$  (with ties broken arbitrarily); elements  $x \in A^c$  are “large” and are ordered by increasing value of  $\mathbf{p}(x) - \mathbf{q}(x)$  (again, with ties broken arbitrarily). The smallest element in  $\mathcal{T}$  maximizes  $\mathbf{q}(x) - \mathbf{p}(x)$  and the largest element in  $\mathcal{T}$  maximizes  $\mathbf{p}(x) - \mathbf{q}(x)$ .

We first establish some easy lemmas.

**Lemma A.10.**  $A = \emptyset$  if and only if  $\mathbf{p} = \mathbf{q}$ .

*Proof.* Immediate.  $\square$

**Lemma A.11.**

$$\sum_{x \in A} [\mathbf{q}(x) - \mathbf{p}(x)] = \sum_{x \in A^c} [\mathbf{p}(x) - \mathbf{q}(x)].$$

*Proof.* We have

$$\begin{aligned} & \sum_{x \in A} [\mathbf{q}(x) - \mathbf{p}(x)] - \sum_{x \in A^c} [\mathbf{p}(x) - \mathbf{q}(x)] \\ &= \sum_{x \in \mathcal{T}} \mathbf{q}(x) - \sum_{x \in \mathcal{T}} \mathbf{p}(x) = 0, \end{aligned}$$

as desired.  $\square$

Given a probability distribution  $\mathbf{r}$ , define its cumulative distribution function  $\tilde{\mathbf{r}}$  by  $\tilde{\mathbf{r}}(x) := \sum_{y \prec x} \mathbf{r}(y)$ .

**Lemma A.12.**  $\tilde{\mathbf{q}}(x) > \tilde{\mathbf{p}}(x)$  for all  $x \in \mathcal{T}$ .

*Proof.* Let  $\mathcal{T}_x := \{y \in \mathcal{T} \mid y \prec x\}$ . If  $x \in A$  then  $\mathcal{T}_x \subseteq A$ , and so

$$\tilde{\mathbf{q}}(x) - \tilde{\mathbf{p}}(x) = \sum_{y \in \mathcal{T}_x} [\mathbf{q}(y) - \mathbf{p}(y)] > 0,$$

since all terms in the sum are positive.

Otherwise,  $y \in A$  for all  $y \prec x$ , and so  $A \subseteq \mathcal{T}_x$ . Let  $A_x^c := \{y \in A^c \mid y \prec x\}$ . Then

$$\tilde{\mathbf{q}}(x) - \tilde{\mathbf{p}}(x)$$

$$\begin{aligned} &= \sum_{y \prec x} [\mathbf{q}(y) - \mathbf{p}(y)] \\ &= \sum_{y \in A} [\mathbf{q}(y) - \mathbf{p}(y)] + \sum_{y \in A_x^c} [\mathbf{q}(y) - \mathbf{p}(y)] \\ &= \sum_{y \in A_x} [\mathbf{q}(y) - \mathbf{p}(y)] - \sum_{y \in A_x^c} [\mathbf{p}(y) - \mathbf{q}(y)] \\ &> \sum_{y \in A_x} [\mathbf{q}(y) - \mathbf{p}(y)] - \sum_{y \in A^c} [\mathbf{p}(y) - \mathbf{q}(y)] \\ &= 0, \end{aligned}$$

establishing the lemma.  $\square$

We now analyze  $\Pr\{R = 0\}$  in the case where  $m = 1$ . In this case, we may drop some subscripts and write  $Y$  in place of  $X_1$ , so that our setting reduces to the following random variables:

$$\begin{aligned} X_{\mathbf{p}} &\sim \mathbf{p} \\ Y_{\mathbf{q}} &\sim \mathbf{q} \\ R_{\mathbf{p},\mathbf{q}} \mid X_{\mathbf{p}}, Y_{\mathbf{q}} &\sim \begin{cases} 0 & \text{if } X_{\mathbf{p}} \succ Y_{\mathbf{q}}, \\ 1 & \text{if } X_{\mathbf{p}} \prec Y_{\mathbf{q}}, \\ \text{Bernoulli}(1/2) & \text{if } X_{\mathbf{p}} = Y_{\mathbf{q}}. \end{cases} \end{aligned}$$

(We have indicated  $\mathbf{p}$  and  $\mathbf{q}$  in the subscripts, for use in the next subsection.)

In other words, the procedure samples  $X_{\mathbf{p}} \sim \mathbf{p}$  and  $Y_{\mathbf{q}} \sim \mathbf{q}$  independently. Given these values, it then sets  $R_{\mathbf{p},\mathbf{q}}$  to be 0 if  $X_{\mathbf{p}} \succ Y_{\mathbf{q}}$ , to be 1 if  $X_{\mathbf{p}} \prec Y_{\mathbf{q}}$ , and the outcome of an independent fair coin flip otherwise.

For the rest of this subsection, we will refer to these random variables simply as  $X$ ,  $Y$ , and  $R$ , though later on we will need them for several choices of distributions  $\mathbf{p}$  and  $\mathbf{q}$  (and accordingly will retain the subscripts).

We now prove the following theorem.

**Theorem A.13** (Theorem 3.6 in the main text). *If  $\mathbf{p} \neq \mathbf{q}$ , then for  $m = 1$  and the ordering  $\prec$  defined above, we have  $\Pr\{R = 0\} > 1/2$ .*

*Proof.* From total probability and independence of  $X$  and  $Y$ , we have

$$\begin{aligned} \Pr\{R = 0\} &= \sum_{x,y \in \mathcal{T}} \Pr\{R=0 \mid X=x, Y=y\} \Pr\{Y = y\} \Pr\{X = x\} \\ &= \sum_{x,y \in \mathcal{T}} \Pr\{R=0 \mid X=x, Y=y\} \mathbf{q}(y) \mathbf{p}(x) \\ &= \sum_{x \in \mathcal{T}} \Pr\{R=0 \mid X=x, Y=x\} \mathbf{q}(x) \mathbf{p}(x) \\ &\quad + \sum_{y \prec x \in \mathcal{T}} \Pr\{R=0 \mid X=x, Y=y\} \mathbf{q}(y) \mathbf{p}(x) \end{aligned}$$

$$\begin{aligned}
 & + \sum_{x \prec y \in \mathcal{T}} \Pr \{R=0 \mid X=x, Y=y\} \mathbf{q}(y) \mathbf{p}(x) \\
 = & \frac{1}{2} \sum_{x \in \mathcal{T}} \mathbf{q}(x) \mathbf{p}(x) + 1 \sum_{y \prec x \in \mathcal{T}} \mathbf{q}(y) \mathbf{p}(x) \\
 & + 0 \sum_{x \prec y \in \mathcal{T}} \mathbf{q}(y) \mathbf{p}(x) \\
 = & \frac{1}{2} \sum_{x \in \mathcal{T}} \mathbf{p}(x) \mathbf{q}(x) + \sum_{x \in \mathcal{T}} \tilde{\mathbf{q}}(x) \mathbf{p}(x).
 \end{aligned}$$

An identical argument establishes that

$$\Pr \{R=1\} = \frac{1}{2} \sum_{x \in \mathcal{T}} \mathbf{p}(x) \mathbf{q}(x) + \sum_{x \in \mathcal{T}} \tilde{\mathbf{p}}(x) \mathbf{q}(x).$$

Since  $\Pr \{R=0\} + \Pr \{R=1\} = 1$ , it suffices to establish that  $\Pr \{R=0\} > \Pr \{R=1\}$ . We have

$$\begin{aligned}
 & \Pr \{R=0\} - \Pr \{R=1\} \\
 = & \sum_{x \in \mathcal{T}} \tilde{\mathbf{q}}(x) \mathbf{p}(x) - \sum_{x \in \mathcal{T}} \tilde{\mathbf{p}}(x) \mathbf{q}(x) \\
 > & \sum_{x \in \mathcal{T}} \tilde{\mathbf{p}}(x) \mathbf{p}(x) - \sum_{x \in \mathcal{T}} \tilde{\mathbf{p}}(x) \mathbf{q}(x) \\
 = & \sum_{x \in \mathcal{T}} \tilde{\mathbf{p}}(x) [\mathbf{p}(x) - \mathbf{q}(x)] \\
 = & \sum_{x \in A^c} \tilde{\mathbf{p}}(x) [\mathbf{p}(x) - \mathbf{q}(x)] - \sum_{x \in A} \tilde{\mathbf{p}}(x) [\mathbf{q}(x) - \mathbf{p}(x)] \\
 \geq & \sum_{x \in A^c} (\max_{y \in A} \tilde{\mathbf{p}}(y)) [\mathbf{p}(x) - \mathbf{q}(x)] \\
 & - \sum_{x \in A} \tilde{\mathbf{p}}(x) [\mathbf{q}(x) - \mathbf{p}(x)] \\
 = & \sum_{x \in A} (\max_{y \in A} \tilde{\mathbf{p}}(y)) [\mathbf{q}(x) - \mathbf{p}(x)] \\
 & - \sum_{x \in A} \tilde{\mathbf{p}}(x) [\mathbf{q}(x) - \mathbf{p}(x)] \\
 = & \sum_{x \in A} (\max_{y \in A} \tilde{\mathbf{p}}(y) - \tilde{\mathbf{p}}(x)) [\mathbf{q}(x) - \mathbf{p}(x)] \\
 > & 0.
 \end{aligned}$$

The first inequality follows from Lemma A.12; the second inequality follows from monotonicity of  $\tilde{\mathbf{p}}$ ; the second-to-last equality follows from Lemma A.11; and the final inequality follows from the fact that all terms in the sum are positive.  $\square$

### A.3 A tighter bound in terms of $L_\infty(\mathbf{p}, \mathbf{q})$

We have just exhibited an ordering such that when  $\mathbf{p} \neq \mathbf{q}$  and  $m=1$ , we have  $\Pr \{R=0\} > 1/2$ . We are now interested in obtaining a tighter lower bound on this probability in terms of the  $L_\infty$  distance between  $\mathbf{p}$  and  $\mathbf{q}$ .

In this subsection and the following one, we assume that  $\mathcal{T}$  is finite. We first note the following immediate lemma.

**Lemma A.14.** *Let  $B, C \subseteq \mathcal{T}$ . For all  $\mathbf{p}, \mathbf{q}$  and all  $\delta > 0$  there is an  $\epsilon > 0$  such that for all distributions  $\mathbf{p}'$  on  $\mathcal{T}$  with  $\sup_{x \in \mathcal{T}} |\mathbf{p}(x) - \mathbf{p}'(x)| < \epsilon$ , we have*

$$\begin{aligned}
 & |\Pr(R_{\mathbf{p}, \mathbf{q}} = 0 \mid X_{\mathbf{p}} \in B, Y_{\mathbf{q}} \in C) \\
 & - \Pr(R_{\mathbf{p}', \mathbf{q}} = 0 \mid X_{\mathbf{p}'} \in B, Y_{\mathbf{q}} \in C)| < \delta.
 \end{aligned}$$

**Definition A.15.** We say that  $\mathbf{p}$  is  $\epsilon$ -discrete (with respect to  $\mathbf{q}$ ) if for all  $a, b \in \mathcal{T}$  we have

$$|\mathbf{h}_{\mathbf{p}, \mathbf{q}}(a) - \mathbf{h}_{\mathbf{p}, \mathbf{q}}(b)| \geq \epsilon.$$

From Lemma A.14 we immediately obtain the following.

**Lemma A.16.** *For all  $\mathbf{p}, \mathbf{q}$  and all  $\delta > 0$  there is an  $\epsilon > 0$  and an  $\epsilon$ -discrete distribution  $\mathbf{p}_\epsilon$  on  $\mathcal{T}$  such that for all  $B, C \subseteq \mathcal{T}$ ,*

$$\begin{aligned}
 & |\Pr(R_{\mathbf{p}, \mathbf{q}} = 0 \mid X_{\mathbf{p}} \in B, Y_{\mathbf{q}} \in C) \\
 & - \Pr(R_{\mathbf{p}_\epsilon, \mathbf{q}} = 0 \mid X_{\mathbf{p}_\epsilon} \in B, Y_{\mathbf{q}} \in C)| < \delta.
 \end{aligned}$$

The next lemma will be crucial for proving our bound.

**Lemma A.17.** *Let  $\mathbf{p}_0$  and  $\mathbf{p}_1$  be probability measures on  $\mathcal{T}$ , and let  $\triangleleft$  be a total order on  $\mathcal{T}$  such that if  $\mathbf{h}_{\mathbf{p}_0, \mathbf{q}}(x) > \mathbf{h}_{\mathbf{p}_0, \mathbf{q}}(x')$  then  $x \triangleleft x'$  and if  $\mathbf{h}_{\mathbf{p}_0, \mathbf{q}}(x) < \mathbf{h}_{\mathbf{p}_0, \mathbf{q}}(x')$  then  $x \triangleright x'$ . Suppose that if  $\mathbf{h}_{\mathbf{p}_0, \mathbf{p}_1}(x) > 0$  and  $\mathbf{h}_{\mathbf{p}_0, \mathbf{p}_1}(y) \leq 0$ , then  $x \triangleleft y$ . Then  $\Pr(R_{\mathbf{p}_0, \mathbf{q}} = 0) \geq \Pr(R_{\mathbf{p}_1, \mathbf{q}} = 0)$ .*

*Proof.* Note that

$$\begin{aligned}
 & \Pr(R_{\mathbf{p}_1, \mathbf{q}} = 0 \mid Y_{\mathbf{q}} = y) \\
 = & \sum_{x \triangleright y} \mathbf{p}_1(x) + \frac{1}{2} \mathbf{p}_1(y) \\
 = & \sum_{x \triangleright y} \mathbf{p}_0(x) + \mathbf{h}_{\mathbf{p}_0, \mathbf{p}_1}(x) + \frac{1}{2} [\mathbf{p}_0(y) + \mathbf{h}_{\mathbf{p}_0, \mathbf{p}_1}(y)] \\
 = & \Pr(R_{\mathbf{p}_0, \mathbf{q}} = 0 \mid Y_{\mathbf{q}} = y) + \sum_{x \triangleright y} \mathbf{h}_{\mathbf{p}_0, \mathbf{p}_1}(x) + \frac{1}{2} \mathbf{h}_{\mathbf{p}_0, \mathbf{p}_1}(y) \\
 = & \Pr(R_{\mathbf{p}_0, \mathbf{q}} = 0 \mid Y_{\mathbf{q}} = y) - \sum_{x \triangleleft y} \mathbf{h}_{\mathbf{p}_0, \mathbf{p}_1}(x) - \frac{1}{2} \mathbf{h}_{\mathbf{p}_0, \mathbf{p}_1}(y),
 \end{aligned}$$

where the last equality holds because  $\sum_{x \in \mathcal{T}} \mathbf{h}_{\mathbf{p}_0, \mathbf{p}_1}(x) = 0$ . But by our assumption, we know that  $\sum_{x \triangleleft y} \mathbf{h}_{\mathbf{p}_0, \mathbf{p}_1}(x) + \frac{1}{2} \mathbf{h}_{\mathbf{p}_0, \mathbf{p}_1}(y)$  is non-negative and so  $\Pr(R_{\mathbf{p}_1, \mathbf{q}} = 0 \mid Y_{\mathbf{q}} = y) \leq \Pr(R_{\mathbf{p}_0, \mathbf{q}} = 0 \mid Y_{\mathbf{q}} = y)$ , from which the result follows.  $\square$

We will now provide a lower bound on  $\Pr(R_{\mathbf{p}, \mathbf{q}} = 0)$ .

**Proposition A.18.**

$$\Pr(R_{\mathbf{p},\mathbf{q}} = 0) \geq \frac{1}{2} + \frac{1}{2} \max_{x \in \mathcal{T}} \mathbf{h}_{\mathbf{p},\mathbf{q}}(x)^2. \quad (31)$$

*Proof.* Recall that  $A := \{x \in \mathcal{T} \mid \mathbf{q}(x) > \mathbf{p}(x)\}$ . First note that by Lemma A.14, we may assume without loss of generality that  $|A| = |\mathcal{T} \setminus A|$ , by adding elements of mass arbitrarily close to 0. Let  $k := |A|$ . Further, by Lemma A.16 we may assume without loss of generality that  $\mathbf{p}, \mathbf{q}$  are an  $\epsilon$ -discrete pair (for some fixed but small  $\epsilon$ ) with  $|\mathcal{T}| \cdot \epsilon < L_\infty(\mathbf{p}, \mathbf{q})$ . Let  $(x_0^+, \dots, x_{k-1}^+)$  be the collection  $A$  listed in  $\prec$ -increasing order. Let  $(x_0^-, \dots, x_{k-1}^-)$  be the collection  $\mathcal{T} \setminus A$  listed in  $\prec$ -increasing order.

Let  $\mathbf{p}^*$  be any probability measure such that

$$\mathbf{p}^*(x) = \begin{cases} \mathbf{p}(x) - e(\ell) & (x = x_\ell^-; e(\ell) \geq 0), \\ \mathbf{q}(x) - (k - \ell) \cdot \epsilon & (x = x_\ell^+; 0 \leq \ell < k - 1), \\ \mathbf{p}(x) & (x = x_0^+). \end{cases}$$

Note that for all  $x, y \in \mathcal{T}$ , we have  $y \prec x$  if and only if  $\mathbf{h}_{\mathbf{p}^*,\mathbf{q}}(x) < \mathbf{h}_{\mathbf{p}^*,\mathbf{q}}(y)$ .

Now, for every  $\ell < k - 1$  we have  $\mathbf{h}_{\mathbf{p},\mathbf{q}}(x_\ell^+) \geq \ell \cdot \epsilon$  (as  $\mathbf{p}, \mathbf{q}$  are an  $\epsilon$ -discrete pair), and so we can always find such a  $\mathbf{p}^*$ . In particular the following are immediate.

- (a)  $x \prec y$  if and only if  $\mathbf{h}_{\mathbf{p}^*,\mathbf{q}}(x) > \mathbf{h}_{\mathbf{p}^*,\mathbf{q}}(y)$ ,
- (b)  $\mathbf{h}_{\mathbf{p},\mathbf{q}}(x_0^+) = \mathbf{h}_{\mathbf{p}^*,\mathbf{q}}(x_0^+)$ ,
- (c) if  $\mathbf{h}_{\mathbf{p},\mathbf{q}^*}(x) > 0$  and  $\mathbf{h}_{\mathbf{p},\mathbf{p}^*}(y) \leq 0$  then  $x \prec y$ , and
- (d)  $(\mathbf{p}, \mathbf{q}^*)$  is an  $\epsilon$ -discrete pair.

Note that  $\Pr(R_{\mathbf{p},\mathbf{q}} = 0) \geq \Pr(R_{\mathbf{p}^*,\mathbf{q}} = 0)$ , by Lemma A.17 and (c). For simplicity, let  $A_0 := \{x_0^+\}$ ,  $A_1 := \{x_i^+\}_{1 \leq i \leq k-1}$  and  $D := \mathcal{T} \setminus A$ .

We now condition on the value of  $Y_{\mathbf{q}}$ , in order to calculate  $\Pr(R_{\mathbf{p}^*,\mathbf{q}} = 0)$ .

**Case 1:**  $Y_{\mathbf{q}} = x_i^-$ . We have

$$\Pr(R_{\mathbf{p}^*,\mathbf{q}} = 0 \mid Y_{\mathbf{q}} = x_i^-) = \sum_{i < \ell < k} \mathbf{p}^*(x_\ell^-) + \frac{1}{2} \mathbf{p}^*(x_i^-).$$

**Case 2:**  $Y_{\mathbf{q}} \in A_1$ . We have

$$\Pr(R_{\mathbf{p}^*,\mathbf{q}} = 0 \mid Y_{\mathbf{q}} \in A_1) = \mathbf{p}^*(D) + \frac{1}{2} \mathbf{p}^*(A_1) + f_0(\epsilon),$$

where  $f_0$  is a function satisfying  $\lim_{\epsilon \rightarrow 0} f_0(\epsilon) = 0$ .

**Case 3:**  $Y_{\mathbf{q}} \in A_0$ . We have

$$\Pr(R_{\mathbf{p}^*,\mathbf{q}} = 0 \mid Y_{\mathbf{q}} \in A_0) = \mathbf{p}^*(A_1) + \mathbf{p}^*(D) + \frac{1}{2} \mathbf{p}^*(A_0).$$

We may calculate these terms as follows:

$$\begin{aligned} \mathbf{p}^*(D) &= \mathbf{q}(D) + \mathbf{h}_{\mathbf{p},\mathbf{q}}(x_0^+) + (k(k-1)/2)\epsilon, \\ \mathbf{p}^*(A_1) &= \mathbf{q}(A_1) - (k(k-1)/2)\epsilon, \\ \mathbf{p}^*(A_0) &= \mathbf{q}(A_0) - \mathbf{h}_{\mathbf{p},\mathbf{q}}(x_0^+). \end{aligned}$$

Putting all of this together, we obtain

$$\begin{aligned} \Pr(R_{\mathbf{p}^*,\mathbf{q}} = 0) &= \sum_{i < k} \sum_{i < \ell < k} \mathbf{q}(x_i^-) \mathbf{p}^*(x_\ell^-) + \frac{1}{2} \sum_{i < k} \mathbf{q}(x_i^-) \mathbf{p}^*(x_i^-) \\ &\quad + \mathbf{q}(A_1) \mathbf{p}^*(D) + \frac{1}{2} \mathbf{q}(A_1) \mathbf{p}^*(A_1) + \mathbf{q}(A_1) f_0(\epsilon) \\ &\quad + \mathbf{q}(A_0) \mathbf{p}^*(A_1) + \mathbf{q}(A_0) \mathbf{p}^*(D) + \frac{1}{2} \mathbf{q}(A_0) \mathbf{p}^*(A_0) \\ &= \sum_{i < k} \sum_{i < \ell < k} \mathbf{q}(x_i^-) [\mathbf{q}(x_\ell^-) - \mathbf{h}_{\mathbf{p}^*,\mathbf{q}}(x_\ell^-)] \\ &\quad + \frac{1}{2} \sum_{i < k} \mathbf{q}(x_i^-) [\mathbf{q}(x_i^-) - \mathbf{h}_{\mathbf{p}^*,\mathbf{q}}(x_i^-)] \\ &\quad + \mathbf{q}(A_1) [\mathbf{q}(D) + \mathbf{h}_{\mathbf{p},\mathbf{q}}(x_0^+)] + \frac{1}{2} \mathbf{q}(A_1) \mathbf{q}(A_1) \\ &\quad + \mathbf{q}(A_0) \mathbf{q}(A_1) + \mathbf{q}(A_0) [\mathbf{q}(D) + \mathbf{h}_{\mathbf{p},\mathbf{q}}(x_0^+)] \\ &\quad + \frac{1}{2} \mathbf{q}(A_0) [\mathbf{q}(A_0) - \mathbf{h}_{\mathbf{p},\mathbf{q}}(x_0^+)] + f_1(\epsilon) \\ &= \sum_{i < k} \sum_{i < \ell < k} \mathbf{q}(x_i^-) \mathbf{q}(x_\ell^-) + \frac{1}{2} \sum_{i < k} \mathbf{q}(x_i^-) \mathbf{q}(x_i^-) \\ &\quad + \mathbf{q}(A_1) \mathbf{q}(D) + \frac{1}{2} \mathbf{q}(A_1) \mathbf{q}(A_1) + \mathbf{q}(A_0) \mathbf{q}(A_1) \\ &\quad + \mathbf{q}(A_0) \mathbf{q}(D) + \frac{1}{2} \mathbf{q}(A_0) \mathbf{q}(A_0) \\ &\quad - \sum_{i < k} \sum_{i < \ell < k} \mathbf{q}(x_i^-) \mathbf{h}_{\mathbf{p}^*,\mathbf{q}}(x_\ell^-) \\ &\quad - \frac{1}{2} \sum_{i < k} \mathbf{q}(x_i^-) \mathbf{h}_{\mathbf{p}^*,\mathbf{q}}(x_i^-) + \mathbf{q}(A_1) \mathbf{h}_{\mathbf{p},\mathbf{q}}(x_0^+) \\ &\quad + \mathbf{q}(A_0) \mathbf{h}_{\mathbf{p},\mathbf{q}}(x_0^+) - \frac{1}{2} \mathbf{q}(A_0) \mathbf{h}_{\mathbf{p},\mathbf{q}}(x_0^+) + f_1(\epsilon) \\ &= \sum_{i < k} \sum_{i < \ell < k} \mathbf{q}(x_i^-) \mathbf{q}(x_\ell^-) + \frac{1}{2} \sum_{i < k} \mathbf{q}(x_i^-) \mathbf{q}(x_i^-) \\ &\quad + \mathbf{q}(A_1) \mathbf{q}(D) + \frac{1}{2} \mathbf{q}(A_1) \mathbf{q}(A_1) + \mathbf{q}(A_0) \mathbf{q}(A_1) \\ &\quad + \mathbf{q}(A_0) \mathbf{q}(D) + \frac{1}{2} \mathbf{q}(A_0) \mathbf{q}(A_0) \\ &\quad - \sum_{i < k} \sum_{i < \ell < k} \mathbf{q}(x_i^-) \mathbf{h}_{\mathbf{p}^*,\mathbf{q}}(x_\ell^-) \\ &\quad - \frac{1}{2} \sum_{i < k} \mathbf{q}(x_i^-) \mathbf{h}_{\mathbf{p}^*,\mathbf{q}}(x_i^-) + \mathbf{q}(A_1) \mathbf{h}_{\mathbf{p},\mathbf{q}}(x_0^+) \\ &\quad + \frac{1}{2} \mathbf{q}(A_0) \mathbf{h}_{\mathbf{p},\mathbf{q}}(x_0^+) + f_1(\epsilon), \end{aligned}$$

where  $f_1$  is a function satisfying  $\lim_{\epsilon \rightarrow 0} f_1(\epsilon) = 0$ .

We also have

$$\begin{aligned} \frac{1}{2} &= \Pr(R_{\mathbf{q}, \mathbf{q}} = 0) \\ &= \sum_{i < k} \sum_{i < \ell < k} \mathbf{q}(x_i^-) \mathbf{q}(x_\ell^-) + \frac{1}{2} \sum_{i < k} \mathbf{q}(x_i^-) \mathbf{q}(x_i^-) \\ &\quad + \mathbf{q}(A_1) \mathbf{q}(D) + \frac{1}{2} \mathbf{q}(A_1) \mathbf{q}(A_1) \\ &\quad + \mathbf{q}(A_0) \mathbf{q}(A_1) + \mathbf{q}(A_0) \mathbf{q}(D) + \frac{1}{2} \mathbf{q}(A_0) \mathbf{q}(A_0). \end{aligned}$$

Putting these two equations together, we obtain

$$\begin{aligned} &\Pr(R_{\mathbf{p}^*, \mathbf{q}} = 0) - \frac{1}{2} \\ &= \Pr(R_{\mathbf{p}^*, \mathbf{q}} = 0) - \Pr(R_{\mathbf{q}, \mathbf{q}} = 0) \\ &= - \sum_{i < k} \sum_{i < \ell < k} \mathbf{q}(x_i^-) \mathbf{h}_{\mathbf{p}^*, \mathbf{q}}(x_\ell^-) \\ &\quad - \frac{1}{2} \sum_{i < k} \mathbf{q}(x_i^-) \mathbf{h}_{\mathbf{p}^*, \mathbf{q}}(x_i^-) + \mathbf{q}(A_1) \mathbf{h}_{\mathbf{p}, \mathbf{q}}(x_0^+) \\ &\quad + \frac{1}{2} \mathbf{q}(A_0) \mathbf{h}_{\mathbf{p}, \mathbf{q}}(x_0^+) + f_1(\epsilon) \\ &\geq \frac{1}{2} \mathbf{q}(A_0) \mathbf{h}_{\mathbf{p}, \mathbf{q}}(x_0^+) + f_1(\epsilon), \end{aligned}$$

as  $\mathbf{h}_{\mathbf{p}^*, \mathbf{q}}(x_\ell^-) \leq 0$  for all  $\ell < k$  and  $\mathbf{h}_{\mathbf{p}, \mathbf{q}}(x_0^+) \leq 0$ .

But we know that

$$\mathbf{q}(A_0) = \mathbf{q}(x_0^+) = \mathbf{p}^*(x_0^+) + \mathbf{h}_{\mathbf{p}, \mathbf{q}}(x_0^+) \geq \mathbf{h}_{\mathbf{p}, \mathbf{q}}(x_0^+).$$

Therefore, as  $\mathbf{h}_{\mathbf{p}, \mathbf{q}}(x_0^+)$  is the maximal value of  $\mathbf{h}_{\mathbf{p}, \mathbf{q}}$ , by taking the limit as  $\epsilon \rightarrow 0$  we obtain

$$\Pr(R_{\mathbf{p}^*, \mathbf{q}} = 0) \geq \frac{1}{2} + \frac{1}{2} \max_{x \in \mathcal{T}} \mathbf{h}_{\mathbf{p}, \mathbf{q}}(x)^2,$$

as desired.  $\square$

Finally, we arrive at the following theorem.

**Theorem A.19.** *Given probability measure  $\mathbf{p}, \mathbf{q}$  on  $\mathcal{T}$  there is a linear ordering  $\sqsubset$  of  $\mathcal{T}$  such that if  $X_{\mathbf{p}}$  and  $Y_{\mathbf{q}}$  are sampled independently from  $\mathbf{p}$  and  $\mathbf{q}$  respectively then*

$$\Pr(X_{\mathbf{q}} \sqsubset Y_{\mathbf{p}}) \geq \frac{1}{2} + \frac{1}{2} L_\infty(\mathbf{p}, \mathbf{q})^2. \quad (32)$$

*Proof.* Note that

$$L_\infty(\mathbf{p}, \mathbf{q}) = \max_{x \in \mathcal{T}} \{ \max_{x \in \mathcal{T}} \mathbf{h}_{\mathbf{p}, \mathbf{q}}(x), \max_{x \in \mathcal{T}} \mathbf{h}_{\mathbf{q}, \mathbf{p}}(x) \}.$$

If  $L_\infty(\mathbf{p}, \mathbf{q}) = \max_{x \in \mathcal{T}} \mathbf{h}_{\mathbf{p}, \mathbf{q}}(x)$ , then the theorem follows from Proposition A.18 using the ordering  $x \sqsubset y$  if and only if  $\mathbf{h}_{\mathbf{p}, \mathbf{q}}(x) > \mathbf{h}_{\mathbf{p}, \mathbf{q}}(y)$ .

If, however,  $L_\infty(\mathbf{p}, \mathbf{q}) = \max_{x \in \mathcal{T}} \mathbf{h}_{\mathbf{q}, \mathbf{p}}(x)$ , then the theorem follows from Proposition A.18 by interchanging  $\mathbf{p}$  and  $\mathbf{q}$ , i.e., by using the ordering  $x \sqsubset y$  if and only if  $\mathbf{h}_{\mathbf{q}, \mathbf{p}}(x) > \mathbf{h}_{\mathbf{q}, \mathbf{p}}(y)$ .  $\square$

## A.4 Sample complexity

We now show how to amplify this result by repeated trials to obtain a bound on the sample complexity of the main algorithm for determining whether  $\mathbf{p} = \mathbf{q}$ .

Let  $\sqsubset$  be the linear ordering defined in Theorem A.19.

**Theorem A.20** (Theorem 3.7 in the main text). *Given significance level  $\alpha = 2\Phi(-c)$  for  $c > 0$ , the proposed test with ordering  $\sqsubset$  and  $m = 1$  achieves power  $\beta \geq 1 - \Phi(-c)$  using*

$$n \approx 4c^2 / L_\infty(\mathbf{p}, \mathbf{q})^4 \quad (33)$$

*samples from  $\mathbf{q}$ , where  $\Phi$  is the cumulative distribution function of a standard normal.*

*Proof.* Assume without loss of generality that the order  $\sqsubset$  from Theorem A.19 is such that  $L_\infty = \max_{s \in \mathcal{T}} (\mathbf{q}(s) - \mathbf{p}(s))$ . Let  $(Y_1, \dots, Y_n) \sim^{\text{iid}} \mathbf{q}$  be the  $n$  samples from  $\mathbf{q}$ . With  $m = 1$ , the testing procedure generates  $n$  samples  $(X_1, \dots, X_n) \sim^{\text{iid}} \mathbf{p}$ , and  $2n$  uniform random variables  $(U_1^Y, \dots, U_n^Y, U_1^X, \dots, U_n^X) \sim^{\text{iid}} \text{Uniform}(0, 1)$  to break ties. Let  $\triangleleft$  denote the lexicographic order on  $\mathcal{T} \times [0, 1]$  induced by  $(\mathcal{T}, \triangleleft)$  and  $([0, 1], <)$ . Define  $W_i := \mathbb{I}[(Y_i, U_i^Y) \triangleleft (X_i, U_i^X)]$ , for  $1 \leq i \leq n$ , to be the rank of the  $i$ -th observation from  $\mathbf{q}$ .

Under the null hypothesis  $H_0$ , each rank  $W_i$  has distribution Bernoulli(1/2) by Lemma A.2. Testing for uniformity of the ranks on  $\{0, 1\}$  is equivalent to testing whether a coin is unbiased given the i.i.d. flips  $\{W_1, \dots, W_n\}$ . Let  $\hat{B} := \sum_{i=1}^n (1 - W_i) / n$  denote the empirical proportion of zeros. By the central limit theorem, for sufficiently large  $n$ , we have that  $\hat{B}$  is approximately normally distributed with mean 1/2 and standard deviation  $1/(2\sqrt{n})$ . For the given significance level  $\alpha = 2\Phi(-c)$ , we form the two-sided reject region  $F = (-\infty, \gamma) \cup (\gamma, \infty)$ , where the critical value  $\gamma$  satisfies

$$c = \frac{\gamma - 1/2}{1/(2\sqrt{n})} = 2\sqrt{n}(\gamma - 1/2). \quad (34)$$

Replacing  $n$  in Eq. (7), we obtain

$$\begin{aligned} \gamma &= 1/2 + c/(2\sqrt{n}) \\ &= 1/2 + c/(2(2c/L_\infty(\mathbf{p}, \mathbf{q})^2)) \\ &= 1/2 + L_\infty(\mathbf{p}, \mathbf{q})^2/4. \end{aligned} \quad (35)$$

This construction ensures that  $\Pr\{\text{reject} \mid H_0\} = \alpha$ .

We now show that the test with this rejection region has power  $\beta \geq \Pr\{\text{reject} \mid H_1\} = 1 - \Phi(-c)$ . Under the alternative hypothesis  $H_1$ , each  $W_i$  has (in the worst case) distribution Bernoulli( $1/2 + L_\infty(\mathbf{p}, \mathbf{q})^2/2$ ) by Theorem A.19, so that the empirical proportion

$\hat{B}$  is approximately normally distributed with mean at least  $1/2 + L_\infty(\mathbf{p}, \mathbf{q})^2/2$  and standard deviation at most  $1/(2\sqrt{n})$ . Under the alternative distribution of  $\hat{B}$ , the standard score  $c'$  of the critical value  $\gamma$  is

$$\begin{aligned} c' &= \frac{\gamma - (1/2 + L_\infty(\mathbf{p}, \mathbf{q})^2/2)}{1/(2\sqrt{n})} \\ &= 2\sqrt{n}((1/2 + L_\infty(\mathbf{p}, \mathbf{q})^2/4) - (1/2 + L_\infty(\mathbf{p}, \mathbf{q})^2/2)) \\ &= -2\sqrt{n}(L_\infty(\mathbf{p}, \mathbf{q})^2/4) \\ &= -\sqrt{n}L_\infty(\mathbf{p}, \mathbf{q})^2/2 \\ &= -c, \end{aligned} \quad (36)$$

where the second equality follows from Eq. (35). Observe that the not reject region  $F^c = [-\gamma, \gamma] \subset (-\infty, \gamma]$ , and so the probability that  $\hat{B}$  falls in  $F^c$  is at most the probability that  $\hat{B} < \gamma$ , which by Eq. (36) is equal to  $\Phi(-c)$ . It is then immediate that  $\beta \geq 1 - \Phi(-c)$ .  $\square$

The following corollary follows directly from Theorem 3.7.

**Corollary A.21.** *As the significance level  $\alpha$  varies, the proposed test with ordering  $\sqsubset$  and  $m = 1$  achieves an overall error  $(\alpha + (1 - \beta))/2 \leq 3\Phi(-c)/2$  using  $n = 4c^2/L_\infty(\mathbf{p}, \mathbf{q})^4$  samples.*

### A.5 Distribution of the test statistic under the alternative hypothesis

In this subsection we derive the distribution of  $R$  under the alternative hypothesis  $\mathbf{p} \neq \mathbf{q}$ . As before, write  $\tilde{\mathbf{p}}(x) := \sum_{x' < x} \mathbf{p}(x')$ .

**Theorem A.22.** *The distribution of  $R$  is given by*

$$\Pr\{R = r\} = \sum_{x \in \mathcal{T}} H(x, m, r) \mathbf{q}(x) \quad (37)$$

for  $0 \leq r \leq m$ , where  $H(x, m, r) :=$

$$\begin{cases} \binom{r}{m} [\tilde{\mathbf{p}}(x)]^r [1 - \tilde{\mathbf{p}}(x)]^{m-r} & (\mathbf{p}(x) = 0) \\ \frac{1}{m+1} & (\mathbf{p}(x) = 1) \\ \sum_{e=0}^m \left\{ \left[ \sum_{j=0}^e \binom{m-e}{r-j} \left[ \frac{\tilde{\mathbf{p}}(x)}{1 - \mathbf{p}(x)} \right]^{r-j} \right. \right. \\ \left. \left. \left[ 1 - \frac{\tilde{\mathbf{p}}(x)}{1 - \mathbf{p}(x)} \right]^{(m-e)-(r-j)} \left( \frac{1}{e+1} \right) \right] \right\} & (0 < \mathbf{p}(x) < 1) \end{cases}$$

*Proof.* Define the following random variables:

$$L := \sum_{i=1}^m \mathbb{I}[X_i < X_0], \quad (38)$$

$$E := \sum_{i=1}^m \mathbb{I}[X_i = X_0], \quad (39)$$

$$G := \sum_{i=1}^m \mathbb{I}[X_i > X_0]. \quad (40)$$

We refer to  $L$ ,  $E$ , and  $G$  as “bins”, where  $L$  is the “less than” bin,  $E$  is the “equal to” bin, and  $G$  is the “greater than” bin (all with respect to  $X_0$ ). Total probability gives

$$\begin{aligned} \Pr\{R = r\} &= \sum_{x \in \mathcal{T}} \Pr\{R = r, X_0 = x\} \\ &= \sum_{\substack{x \in \mathcal{T} \\ \mathbf{q}(x) > 0}} \Pr\{R = r | X_0 = x\} \mathbf{q}(x). \end{aligned}$$

Fix  $x \in \mathcal{T}$  such that  $\mathbf{q}(x) > 0$ . Consider  $\Pr\{R = r | X_0 = s\}$ . The counts in bins  $L$ ,  $E$ , and  $G$  are binomial random variables with  $m$  trials, where the bin  $L$  has success probability  $\tilde{\mathbf{p}}(x)$ , the bin  $E$  has success probability  $\mathbf{p}(x)$ , and the bin  $G$  has success probability  $1 - (\tilde{\mathbf{p}}(x) + \mathbf{p}(x))$ . We now consider three cases.

**Case 1:**  $\mathbf{p}(x) = 0$ . The event  $\{E = 0\}$  occurs with probability one since each  $X_i$ , for  $1 \leq i \leq m$ , cannot possibly be equal to  $x$ . Therefore, conditioned on  $\{X_0 = x\}$ , the event  $\{R = r\}$  occurs if and only if  $\{L = r\}$ . Since  $L$  is binomially distributed,

$$\begin{aligned} \Pr\{R = r | X_0 = x\} &= \Pr\{L = r | X_0 = x\} \\ &= \binom{m}{r} [\tilde{\mathbf{p}}(x)]^r [1 - \tilde{\mathbf{p}}(x)]^{m-r}. \end{aligned}$$

**Case 2:**  $\mathbf{p}(x) = 1$ . Then the event  $\{E = m\}$  occurs with probability one since each  $X_i$ , for  $1 \leq i \leq m$ , can only equal  $s$ . The uniform numbers  $U_0, \dots, U_m$  used to break the ties will determine the rank  $R$  of  $X_0$ . Let  $B$  be the rank of  $U_0$  among the  $m$  other uniform random variables  $U_1, \dots, U_m$ . The event  $\{R = r\}$  occurs if and only if  $\{B = r\}$ . Since the  $U_i$  are i.i.d.,  $B$  is uniformly distributed over  $\{0, 1, 2, \dots, m\}$  by Lemma A.2. Hence

$$\Pr\{R = r | X_0 = x\} = \Pr\{B = r | X_0 = x\} = \frac{1}{m+1}.$$

**Case 3:**  $0 < \mathbf{p}(x) < 1$ . By total probability,

$$\begin{aligned} \Pr\{R = r | X_0 = x\} &= \sum_{e=0}^m \Pr\{R = r | X_0 = x, E = e\} \Pr\{E = e | X_0 = x\}. \end{aligned}$$

Since  $E$  is binomially distributed,

$$\Pr\{E = e | X_0 = x\} = \binom{m}{e} [\mathbf{p}(x)]^e [1 - \mathbf{p}(x)]^{m-e}.$$

We now tackle the event  $\{R = r \mid X_0 = x, E = e\}$ . The uniform numbers  $U_0, \dots, U_m$  used to break the ties will determine the rank  $R$  of  $X_0$ . Define  $B$  to be the rank of  $U_0$  among the  $e$  other uniform random variables assigned to bin  $E$ , i.e., those  $U_i$  for  $1 \leq i \leq m$  such that  $X_i = s$ . The random variable  $B$  is independent of all the  $X_i$ , but is dependent on  $E$ . Given  $\{E = e\}$ ,  $B$  is uniformly distributed on  $\{0, 1, \dots, e\}$ . By total probability,

$$\begin{aligned} & \Pr \{R = r \mid X_0 = x, E = e\} \\ &= \sum_{b=0}^e [\Pr \{R = r \mid X_0 = x, E = e, B = b\} \\ & \quad \Pr \{B = b \mid E = e\}] \\ &= \sum_{b=0}^e \Pr \{R = r \mid X_0 = x, E = e, B = b\} \frac{1}{e+1}. \end{aligned}$$

Conditioned on  $\{E = e\}$  and  $\{B = 0\}$ , the event  $\{R = r\}$  occurs if and only if  $\{L = r\}$ , since exactly 0 random variables in bin  $E$  “are less” than  $X_0$ , so exactly  $r$  random variables in bin  $L$  are needed to ensure that the rank of  $X_0$  is  $r$ . By the same reasoning, for  $0 \leq b \leq e$ , conditioned on  $\{E = e, B = b\}$  we have  $\{R = r\}$  if and only if  $\{L = r - b\}$ .

Now, conditioned on  $\{E = e\}$ , there are  $m - e$  remaining assignments to be split among bins  $L$  and  $G$ . Let  $i$  be such that  $X_i \neq x$ . Then the relative probability that  $X_i$  is assigned to bin  $L$  is  $\tilde{\mathbf{p}}(x)$  and to bin  $G$  is  $1 - (\tilde{\mathbf{p}}(x) + \mathbf{p}(x))$ . Renormalizing these probabilities, we conclude that  $L$  is conditionally (given  $\{E = e\}$ ) a binomial random variable with  $m - e$  trials and success probability  $\tilde{\mathbf{p}}(x)/(\tilde{\mathbf{p}}(x) + (1 - (\tilde{\mathbf{p}}(x) + \mathbf{p}(x)))) = \tilde{\mathbf{p}}(x)/(1 - \mathbf{p}(x))$ . Hence

$$\begin{aligned} & \Pr \{R = r \mid X_0 = x, E = e, B = b\} \\ &= \Pr \{L = r - b \mid X_0 = x, E = e\} \\ &= \binom{m - e}{r - j} \left[ \frac{\tilde{\mathbf{p}}(x)}{1 - \mathbf{p}(x)} \right]^{r-j} \left[ 1 - \frac{\tilde{\mathbf{p}}(x)}{1 - \mathbf{p}(x)} \right]^{(m-e)-(r-j)}, \end{aligned}$$

completing the proof.  $\square$

**Remark A.23.** The sum in Eq. (37) of Theorem A.22 converges since  $H(x, m, r) \leq 1$ .

**Remark A.24.** Theorem A.22 shows that it is not the case that we must have  $\mathbf{p} = \mathbf{q}$  whenever there exists some  $m$  for which the rank  $R$  is uniform on  $[m + 1]$ . For example, let  $m = 1$ , let  $\mathcal{T} := \{0, 1, 2, 3\}$ , let  $<$  be the usual order  $<$  on  $\mathcal{T}$ , and let  $\mathbf{p} := \frac{1}{2}\delta_0 + \frac{1}{2}\delta_3$  and  $\mathbf{q} := \frac{1}{2}\delta_1 + \frac{1}{2}\delta_2$ . Let  $X \sim \mathbf{p}$  and  $Y \sim \mathbf{q}$ . Then we have  $\Pr \{R = 0\} = \Pr \{X > Y\} = 1/2 = \Pr \{Y < X\} = \Pr \{R = 1\}$ .

Rather, Theorem A.1 tells us merely if  $R$  is not uniform on  $\{0, \dots, m\}$  for *some*  $m$ , then  $\mathbf{p} \neq \mathbf{q}$ . In the example given above,  $m = 2$  (and so by Theorem A.7 all  $m \geq 2$ ) provides such a witness.
